# Supplementary material for: Design of Novel IRAK4 Inhibitors Using Molecular Docking, Dynamics Simulation and 3D-QSAR Studies
Source: MDPI journal article supplement (doi:10.3390/molecules27196307), 2022-09-24
Supplement: s1 [file s1]

### Supplementary Material

**Table S1.** The chemical structures and activity values (IC<sub>50</sub>) of the selected 4,6- diaminonicotinamide IRAK4 antagonists.

| 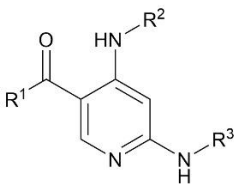 |                                                                                     |                                                                                     |                                                                                      |                       |
|------------------------------------------------------------------------------------|-------------------------------------------------------------------------------------|-------------------------------------------------------------------------------------|--------------------------------------------------------------------------------------|-----------------------|
| Compound                                                                           | R <sup>1</sup>                                                                      | R <sup>2</sup>                                                                      | R <sup>3</sup>                                                                       | IC <sub>50</sub> (nM) |
| 1                                                                                  |  |  |  | 1800                  |
| 2*                                                                                 |                                                                                     |  |                                                                                      | 730                   |
| 3                                                                                  |                                                                                     |  |                                                                                      | 840                   |
| 4                                                                                  |                                                                                     |  |  | 360                   |
| 5*                                                                                 |                                                                                     |                                                                                     |  | 390                   |

|     |                                                                                     |                                                                                     |                                                                                      |       |
|-----|-------------------------------------------------------------------------------------|-------------------------------------------------------------------------------------|--------------------------------------------------------------------------------------|-------|
| 6   |                                                                                     |                                                                                     | 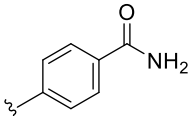   | 470   |
| 7*  |                                                                                     |                                                                                     |    | 10000 |
| 8*  |                                                                                     |    |                                                                                      | 180   |
| 9*  |                                                                                     |                                                                                     |                                                                                      | 19    |
| 10  |    |                                                                                     |                                                                                      | 10    |
| 11  |    |                                                                                     |                                                                                      | 64    |
| 12* |    |                                                                                     |                                                                                      | 50    |
| 13  |    |    |                                                                                      | 70    |
| 14  |   |                                                                                     |                                                                                      | 50    |
| 15* |  |                                                                                     |                                                                                      | 14600 |
| 16* |                                                                                     |  |                                                                                      | 730   |
| 17* |                                                                                     |  |  | 13    |
| 18* |                                                                                     |  |                                                                                      | 20    |
| 19  |                                                                                     |  |                                                                                      | 47    |
| 20  |  |  |                                                                                      | 130   |
| 21* |                                                                                     |  |                                                                                      | 82    |
| 22  |                                                                                     |  |                                                                                      | 170   |
| 23  |                                                                                     |  |                                                                                      | 40    |

|     |                                                                                     |                                                                                     |  |                                                                                      |                                                                                      |
|-----|-------------------------------------------------------------------------------------|-------------------------------------------------------------------------------------|--|--------------------------------------------------------------------------------------|--------------------------------------------------------------------------------------|
| 24  |                                                                                     | 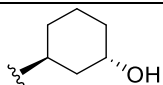   |  | 25                                                                                   |                                                                                      |
| 25  |                                                                                     |    |  | 11                                                                                   |                                                                                      |
| 26  |                                                                                     |    |  | 21                                                                                   |                                                                                      |
| 27* |                                                                                     |    |  | 2000                                                                                 |                                                                                      |
| 28  |                                                                                     |    |  | 50                                                                                   |                                                                                      |
| 29  |                                                                                     |  |  | 5                                                                                    |                                                                                      |
| 30  | H                                                                                   |                                                                                     |  | 20                                                                                   |                                                                                      |
| 31  |  |  |  |    | 5                                                                                    |
| 32  |                                                                                     |                                                                                     |  |  | 10                                                                                   |
| 33  |                                                                                     |                                                                                     |  |  | 4                                                                                    |
| 34  |                                                                                     |                                                                                     |  |  | 13                                                                                   |
| 35  |                                                                                     |                                                                                     |  |  | 5                                                                                    |
| 36  |                                                                                     |                                                                                     |  |  | 10                                                                                   |
| 37  |                                                                                     |                                                                                     |  |  | 10                                                                                   |
| 38  |                                                                                     |                                                                                     |  |                                                                                      |  |

\*Test set compounds

**Table S2:** The predicted pIC<sub>50</sub> and residual values for the RF–CoMFA model.

| Compound | Actual pIC <sub>50</sub> | RF–CoMFA                    |          |
|----------|--------------------------|-----------------------------|----------|
|          |                          | Predicted pIC <sub>50</sub> | Residual |
| 01       | 5.745                    | 6.043                       | -0.298   |
| 02       | 6.137                    | 6.919                       | -0.782   |
| 03       | 6.076                    | 6.001                       | 0.075    |
| 04       | 6.444                    | 6.37                        | 0.074    |
| 05       | 6.409                    | 6.231                       | 0.178    |
| 06       | 6.328                    | 6.192                       | 0.136    |
| 07       | 5                        | 5.931                       | -0.931   |
| 08       | 6.745                    | 6.192                       | 0.553    |
| 09       | 7.721                    | 7.081                       | 0.64     |
| 10       | 8                        | 7.481                       | 0.519    |
| 11       | 7.194                    | 7.268                       | -0.074   |
| 12       | 7.301                    | 7.393                       | -0.092   |
| 13       | 7.155                    | 7.247                       | -0.092   |
| 14       | 7.301                    | 7.406                       | -0.105   |
| 15       | 4.836                    | 5.250                       | -0.414   |
| 16       | 6.137                    | 6.588                       | -0.451   |
| 17       | 7.886                    | 6.906                       | 0.98     |
| 18       | 7.699                    | 7.345                       | 0.354    |
| 19       | 7.328                    | 7.317                       | 0.011    |
| 20       | 6.886                    | 7.477                       | -0.591   |
| 21       | 7.086                    | 7.526                       | -0.44    |
| 22       | 6.77                     | 6.62                        | 0.15     |
| 23       | 7.398                    | 7.529                       | -0.131   |
| 24       | 7.602                    | 7.503                       | 0.099    |
| 25       | 7.959                    | 7.573                       | 0.386    |
| 26       | 7.678                    | 7.673                       | 0.005    |
| 27       | 5.699                    | 6.198                       | -0.499   |
| 28       | 7.301                    | 7.473                       | -0.172   |
| 29       | 8.301                    | 8.118                       | 0.183    |
| 30       | 7.699                    | 7.818                       | -0.119   |
| 31       | 8.301                    | 8.406                       | -0.105   |
| 32       | 8                        | 7.946                       | 0.054    |
| 33       | 8.398                    | 8.213                       | 0.185    |
| 34       | 7.886                    | 7.796                       | 0.09     |
| 35       | 8.301                    | 8.253                       | 0.048    |
| 36       | 8                        | 7.973                       | 0.027    |
| 37       | 8                        | 8.115                       | -0.115   |
| 38       | 7.886                    | 8.128                       | -0.242   |
